# Supplementary material for: Effect of doping and defects on the electronic properties of MoS2/WSe2 bilayer heterostructure: a first-principles study
Source: Royal Society of Chemistry journal article supplement (doi:10.1039/d4cp01673d), 2024-01-01
Supplement: d4cp01673d1.pdf [file d4cp01673d1.pdf]

# Effect of Doping and Defects on the Electronic Properties of MoS<sub>2</sub>/WSe<sub>2</sub> Bilayer Heterostructure: A First-principles Study

Xingliang Wang,<sup>a</sup> Guijuan Zhao,<sup>\*a</sup> Xiurui Lv,<sup>a</sup> Mingyang Zhao,<sup>b</sup> Wanting Wei<sup>a</sup> and Guipeng Liu<sup>a</sup>

a. School of Physical Science and Technology, Lanzhou University, Lanzhou 730000, China. E-mail: zhaogj@lzu.edu.cn

b. Institute of Modern Physics, Chinese Academy of Sciences, Lanzhou 730000, China.

## Supplementary Materials

Table S1 The lattice constants, interlayer distance, and formation energy for the four configurations using DFT-D3(BJ).

| Stacking | a(Å)  | Interlayer distance (Å) | Formation Energy (eV) | Bandgap (eV) |
|----------|-------|-------------------------|-----------------------|--------------|
| AA       | 3.214 | 3.579                   | -1.984                | 0.594        |
| T        | 3.216 | 2.925                   | -3.659                | 0.749        |
| C7       | 3.226 | 2.968                   | -3.618                | 0.769        |
| C27      | 3.218 | 3.036                   | -3.206                | 0.660        |

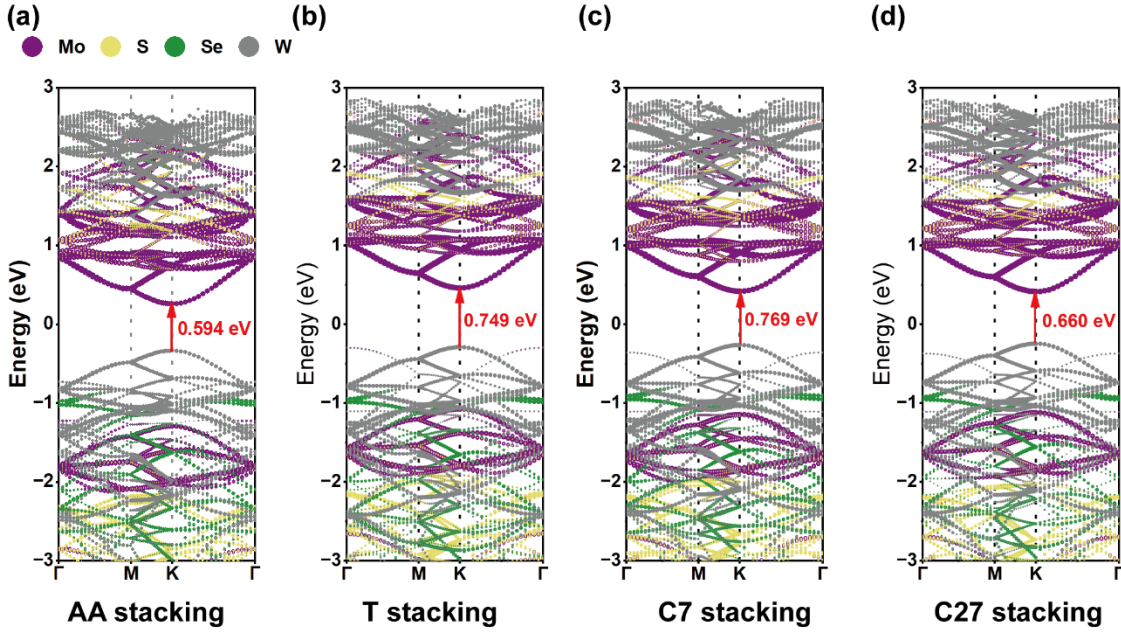

Fig. S1. The band structure of (a) AA stacking, (b) T stacking, (c) C7 stacking, (d) C27 stacking  $\text{MoS}_2/\text{WSe}_2$  bilayer heterostructure using DFT-D3(BJ).

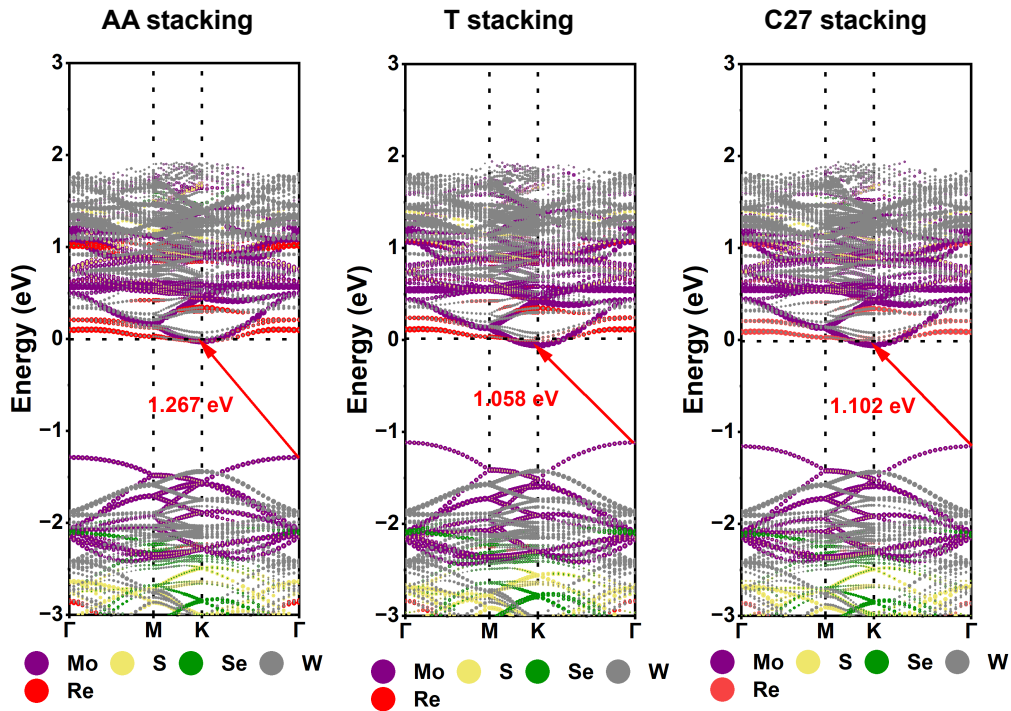

Fig. S2. The band structure of (a) AA stacking, (b) T stacking, and (c) C27 stacking  $\text{MoS}_2/\text{Re-doped WSe}_2$  bilayer heterostructures.

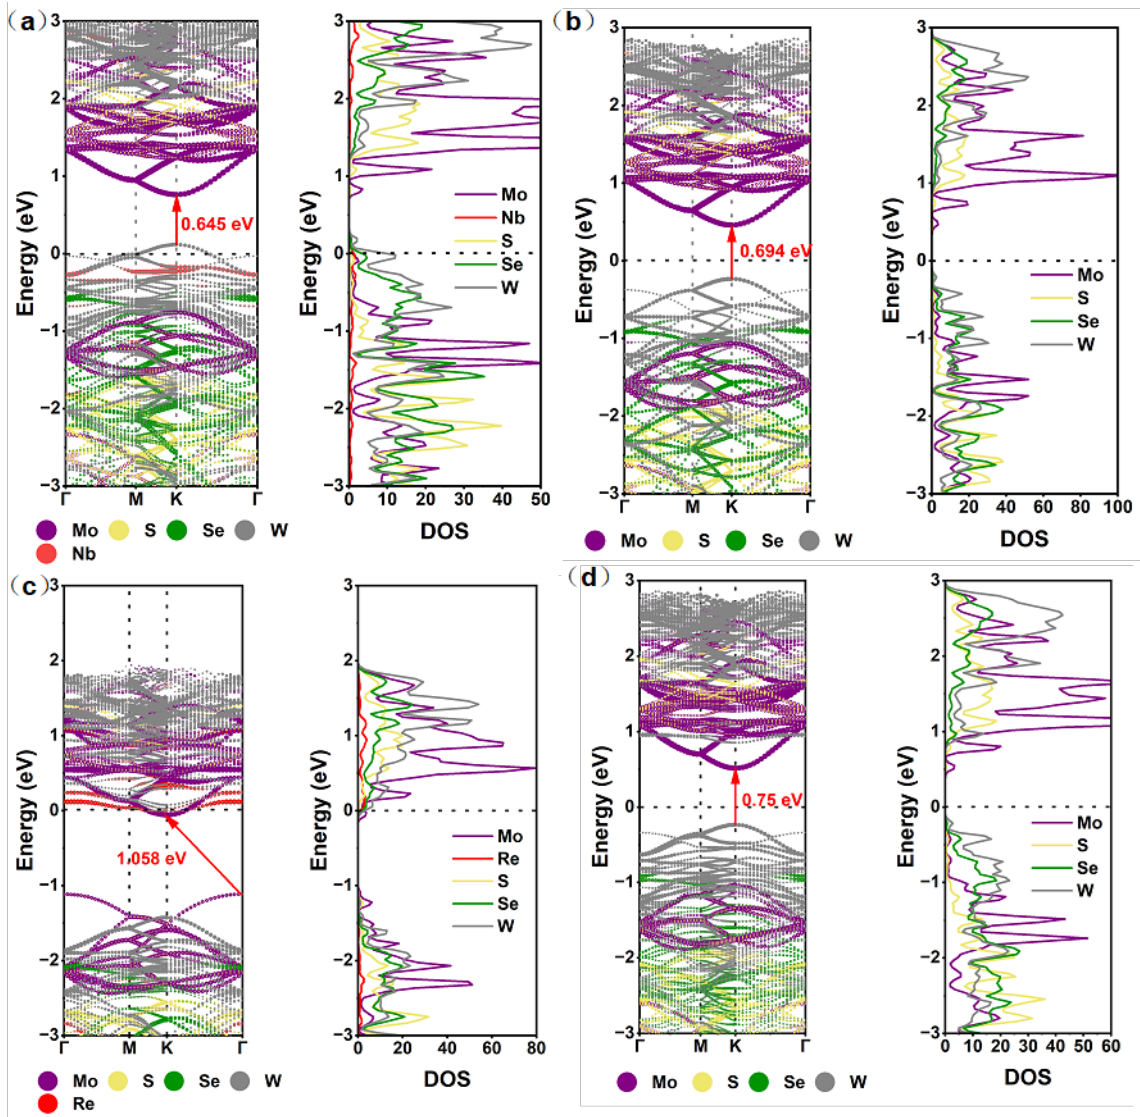

Fig. S3. The band structure and DOS of (a) MoS<sub>2</sub>/Nb-doped WSe<sub>2</sub> bilayer heterostructure, (b) MoS<sub>2</sub>/Mo-doped WSe<sub>2</sub> bilayer heterostructure, (c) MoS<sub>2</sub>/Re-doped WSe<sub>2</sub> bilayer heterostructure, and (d) MoS<sub>2</sub>/Se-vacancy WSe<sub>2</sub> bilayer heterostructure under T stacking.
